# Supplementary material for: Fabrication of multinuclear copper cluster-based coordination polymers as urease inhibitors
Source: Royal Society of Chemistry journal article supplement (doi:10.1039/d3dt03459c), 2023-12-08
Supplement: d3dt03459c1.pdf [file d3dt03459c1.pdf]

## Fabrication of multinuclear copper cluster-based coordination polymers as urease inhibitors

Wen-Long Duan<sup>a</sup>, Kai-Tong Wang<sup>a</sup>, Feng Yan<sup>a\*</sup>, and Jian Luan<sup>a\*</sup>

<sup>a</sup> College of Science, Shenyang University of Chemical Technology, Shenyang, 110142, P. R. China

E-mails: [yanfeng@syuct.edu.cn](mailto:yanfeng@syuct.edu.cn) (F. Yan), [2010044@stu.neu.edu.cn](mailto:2010044@stu.neu.edu.cn) (J. Luan)

**Table S1** Crystallographic data for **Cu-CP-1** and **Cu-CP-2**.

| Complex                                      | <b>Cu-CP-1</b>                                                                   | <b>Cu-CP-2</b>                                                  |
|----------------------------------------------|----------------------------------------------------------------------------------|-----------------------------------------------------------------|
| Empirical formula                            | C <sub>22</sub> H <sub>28</sub> Cu <sub>2</sub> N <sub>4</sub> O <sub>15</sub> S | C <sub>21</sub> H <sub>17</sub> CuN <sub>2</sub> O <sub>5</sub> |
| $F_w$                                        | 747.62                                                                           | 440.91                                                          |
| Crystal system                               | Monoclinic                                                                       | Triclinic                                                       |
| Space group                                  | <i>P</i> 2 <sub>1</sub> / <i>c</i>                                               | <i>P</i> -1                                                     |
| <i>a</i> (Å)                                 | 10.8031(3)                                                                       | 9.5561(8)                                                       |
| <i>b</i> (Å)                                 | 11.9354(4)                                                                       | 10.8019(9)                                                      |
| <i>c</i> (Å)                                 | 23.5047(6)                                                                       | 11.0894(10)                                                     |
| $\alpha$ (°)                                 | 90                                                                               | 79.438(3)                                                       |
| $\beta$ (°)                                  | 109.463(2)                                                                       | 79.785(3)                                                       |
| $\gamma$ (°)                                 | 90                                                                               | 66.454(3)                                                       |
| V (Å <sup>3</sup> ), Z, T (K)                | 2857.50(14), 4, 296(2)                                                           | 1024.70(15), 2, 296(2)                                          |
| D <sub>c</sub> (g cm <sup>-3</sup> ), F(000) | 1.738, 1528                                                                      | 1.429, 452                                                      |
| Goodness-of-fit on $F^2$                     | 1.049                                                                            | 1.021                                                           |
| R <sub>int</sub>                             | 0.0540                                                                           | 0.0716                                                          |
| $R_1$ ( $I > 2\sigma(I)$ ) <sup>a</sup>      | 0.0465                                                                           | 0.0555                                                          |
| $wR_2^b$ (all data)                          | 0.0465                                                                           | 0.1604                                                          |

<sup>a</sup>  $R_1 = \Sigma||F_o| - |F_c|| / \Sigma|F_o|$ , <sup>b</sup>  $wR_2 = \Sigma[w(F_o^2 - F_c^2)^2] / \Sigma[w(F_o^2)]^{1/2}$ .

**Table S2** Selected bond distances (Å) and angles (°) for **Cu-CP-1**.

|                     |            |                      |            |
|---------------------|------------|----------------------|------------|
| Cu(1)–O(1)          | 1.956(3)   | Cu(2)–O(2)           | 1.941(3)   |
| Cu(1)–O(4)#1        | 1.961(3)   | Cu(2)–O(3)#2         | 1.951(3)   |
| Cu(1)–O(8)          | 1.969(3)   | Cu(2)–O(8)#3         | 1.984(3)   |
| Cu(1)–N(1)          | 2.039(3)   | Cu(2)–O(8)           | 1.997(3)   |
| Cu(1)–O(2W)         | 2.227(3)   | O(1W)–Cu(2)          | 2.321(3)   |
| Cu(2)–Cu(2)#3       | 3.0082(9)  | O(1)–Cu(1)–O(4)#1    | 152.48(14) |
| O(1)–Cu(1)–O(8)     | 92.54(11)  | O(2)–Cu(2)–O(8)      | 92.76(11)  |
| O(4)#1–Cu(1)–O(8)   | 92.07(11)  | O(3)#2–Cu(2)–O(8)    | 161.61(13) |
| O(1)–Cu(1)–N(1)     | 88.96(13)  | O(8)#3–Cu(2)–O(8)    | 81.85(11)  |
| O(4)#1–Cu(1)–N(1)   | 86.21(13)  | O(2)–Cu(2)–O(1W)     | 91.90(13)  |
| O(8)–Cu(1)–N(1)     | 178.28(12) | O(3)#2–Cu(2)–O(1W)   | 93.88(13)  |
| O(1)–Cu(1)–O(2W)    | 111.92(13) | O(8)#3–Cu(2)–O(1W)   | 89.27(11)  |
| O(4)#1–Cu(1)–O(2W)  | 95.52(13)  | O(8)–Cu(2)–O(1W)     | 104.43(11) |
| O(8)–Cu(1)–O(2W)    | 84.67(12)  | O(2)–Cu(2)–Cu(2)#3   | 133.53(9)  |
| N(1)–Cu(1)–O(2W)    | 95.55(13)  | O(3)#2–Cu(2)–Cu(2)#3 | 138.46(9)  |
| O(2)–Cu(2)–O(3)#2   | 84.82(12)  | O(8)#3–Cu(2)–Cu(2)#3 | 41.08(7)   |
| O(2)–Cu(2)–O(8)#3   | 174.60(11) | O(8)–Cu(2)–Cu(2)#3   | 40.77(7)   |
| O(3)#2–Cu(2)–O(8)#3 | 100.36(11) | O(1W)–Cu(2)–Cu(2)#3  | 99.03(8)   |

Symmetry codes: #1  $x + 1, y, z$ ; #2  $-x - 1, -y - 2, -z - 1$ ; #3  $-x, -y - 2, -z - 1$ .

**Table S3** Selected bond distances (Å) and angles (°) for **Cu-CP-2**.

|                     |            |                      |           |
|---------------------|------------|----------------------|-----------|
| Cu(1)–O(4)#1        | 1.962(3)   | Cu(1)–O(3)           | 1.974(3)  |
| Cu(1)–O(2)#1        | 1.962(2)   | Cu(1)–N(1)           | 2.177(3)  |
| Cu(1)–O(1)          | 1.964(3)   | Cu(1)–Cu(1)#1        | 2.6513(8) |
| O(4)#1–Cu(1)–O(2)#1 | 89.12(12)  | O(1)–Cu(1)–N(1)      | 92.04(11) |
| O(4)#1–Cu(1)–O(1)   | 88.34(12)  | O(3)–Cu(1)–N(1)      | 92.91(11) |
| O(2)#1–Cu(1)–O(1)   | 167.76(10) | O(4)#1–Cu(1)–Cu(1)#1 | 84.79(8)  |
| O(4)#1–Cu(1)–O(3)   | 167.56(10) | O(2)#1–Cu(1)–Cu(1)#1 | 85.60(7)  |
| O(2)#1–Cu(1)–O(3)   | 89.09(12)  | O(1)–Cu(1)–Cu(1)#1   | 82.24(8)  |
| O(1)–Cu(1)–O(3)     | 90.81(13)  | O(3)–Cu(1)–Cu(1)#1   | 82.80(8)  |
| O(4)#1–Cu(1)–N(1)   | 99.52(11)  | N(1)–Cu(1)–Cu(1)#1   | 172.78(8) |
| O(2)#1–Cu(1)–N(1)   | 100.19(10) |                      |           |

Symmetry code: #1  $-x, -y, -z + 1$ .

**Table S4** Hydrogen bonding geometries (Å, °) of **Cu-CP-1** and **Cu-CP-2**.

| D–H···A                      | D–H  | H···A | D···A  | D–H···A |
|------------------------------|------|-------|--------|---------|
| N4–H4B···O6 <sup>i</sup>     | 0.86 | 2.11  | 2.9192 | 156     |
| O1W–H1WB···O9 <sup>ii</sup>  | 0.85 | 1.87  | 2.7014 | 164     |
| C12–H12A···O5 <sup>iii</sup> | 0.93 | 2.48  | 3.3079 | 148     |

Symmetry codes: <sup>i</sup>  $2 - x, -y, -z$ ; <sup>ii</sup>  $1 + x, 1/2 - y, 1/2 + z$ ; <sup>iii</sup>  $x, 1 + y, -1 + z$ .

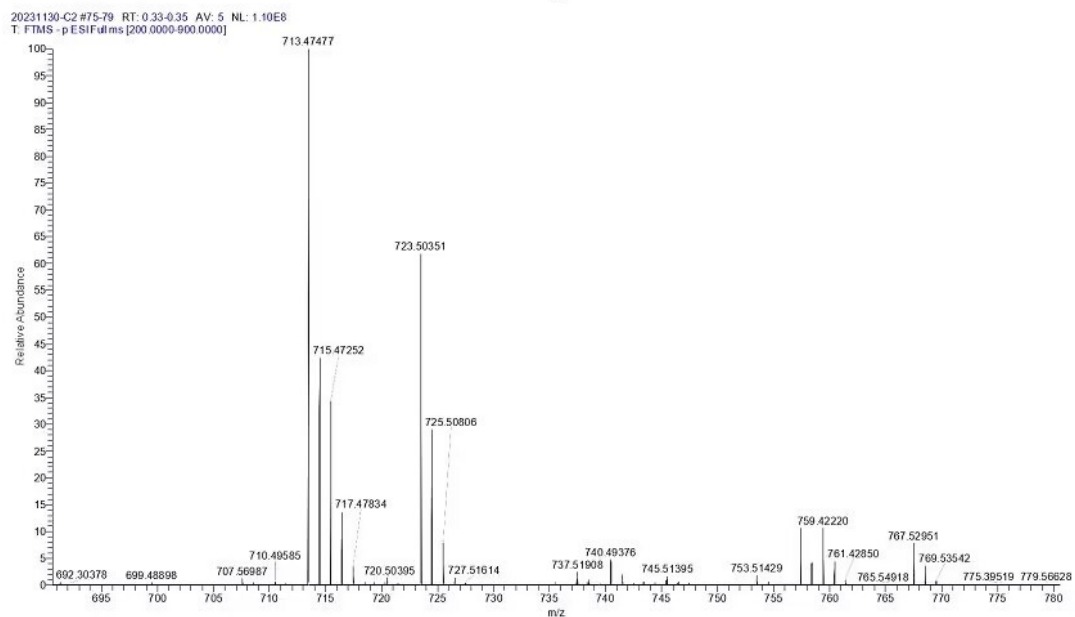

**Fig. S1** The mass spectra of the **Cu-CP-1**.

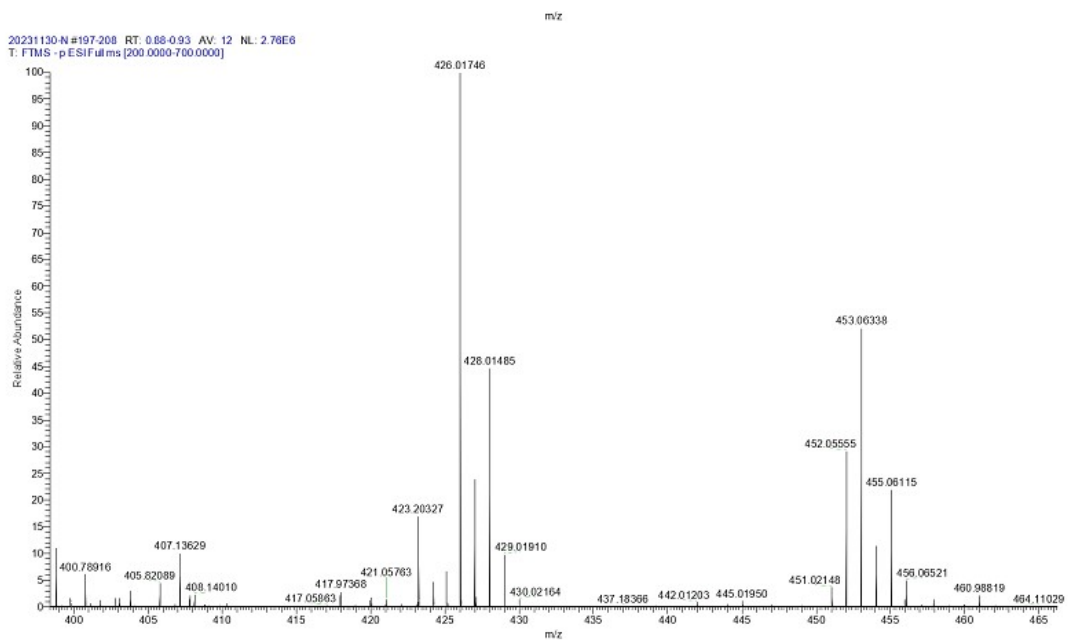

**Fig. S2** The mass spectra of the **Cu-CP-2**.

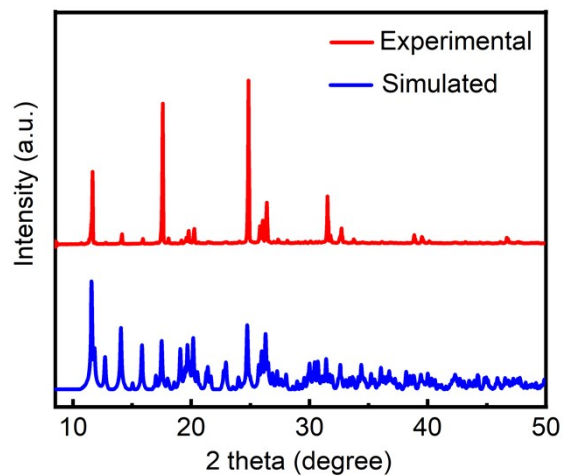

**Fig. S3** The PXR D patterns of **Cu-CP-1**.

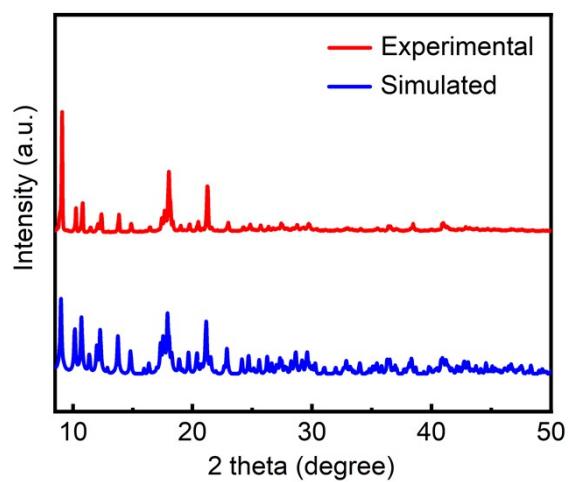

**Fig. S4** The PXR D patterns of **Cu-CP-2**.

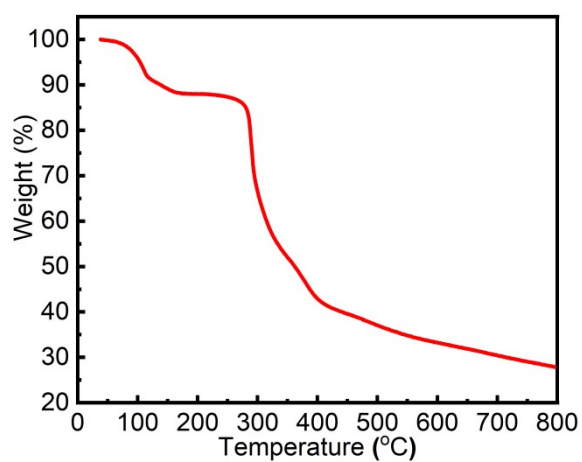

**Fig. S5** TGA curve of **Cu-CP-1**.

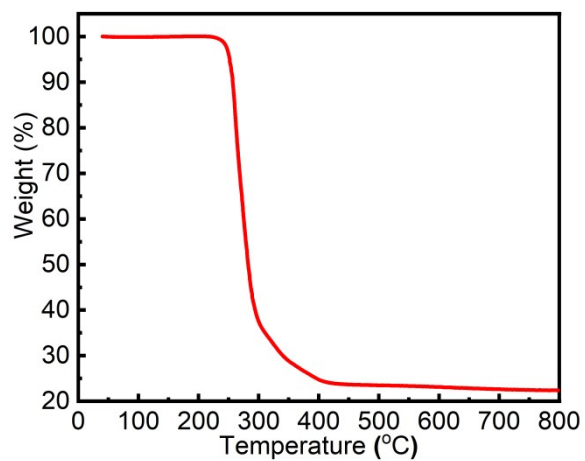

**Fig. S6** TGA curve of **Cu-CP-2**.

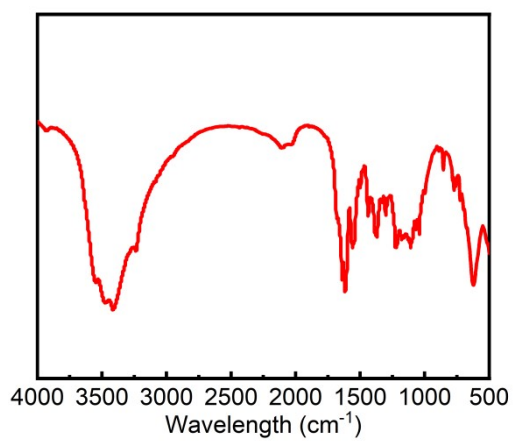

**Fig. S7** The IR spectrum of **Cu-CP-1**.

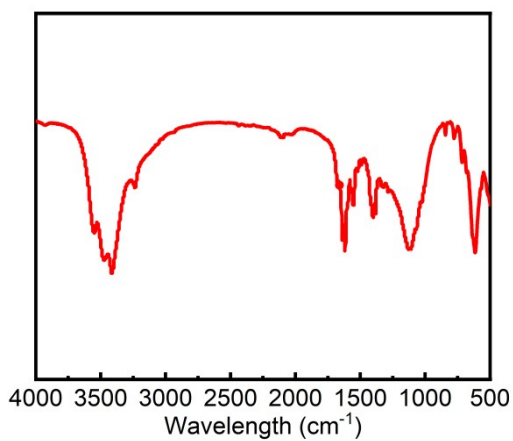

**Fig. S8** The IR spectrum of **Cu-CP-2**.

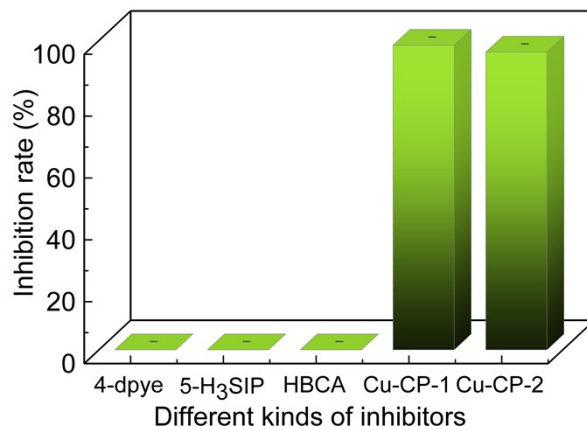

**Fig. S9** Inhibition of urease by Cu-CPs and ligands at 100 μM concentration.

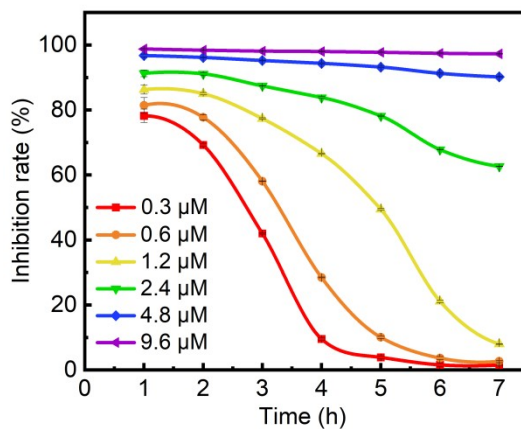

**Fig. S10** Inhibitory activity curves of **Cu-CP-1** from the concentration of 0.3 μM to 9.6 μM.

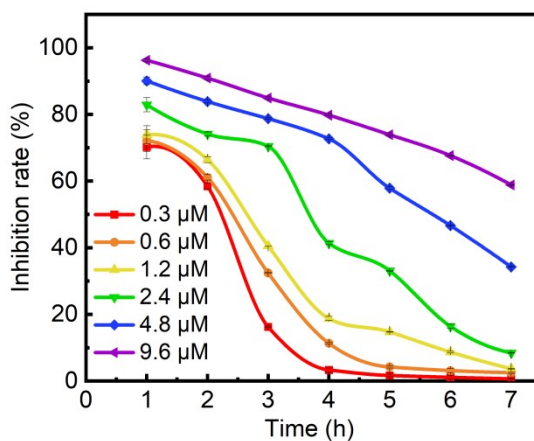

**Fig. S11** Inhibitory activity curves of **Cu-CP-2** from the concentration of 0.3 μM to 9.6 μM.
